# Supplementary material for: The association of parental temperament and character on their children’s behavior problems
Source: PeerJ. 2015 Dec 1;3:e1464. doi: 10.7717/peerj.1464 (PMC4671186; doi:10.7717/peerj.1464)
Supplement: Supplemental Information 1 [file peerj-03-1464-s001.xlsx]

## Sheet: Sheet1
ID	testyear	testmonth	testday	age_months	sex	birthyear	birthmonth	birthday	CBCL_01	CBCL_02	CBCL_03	CBCL_04	CBCL_05	CBCL_06	CBCL_07	CBCL_08	CBCL_09	CBCL_10	CBCL_11	CBCL_12	CBCL_13	CBCL_14	CBCL_15	CBCL_16	CBCL_17	CBCL_18	CBCL_19	CBCL_20	CBCL_21	CBCL_22	CBCL_23	CBCL_24	CBCL_25	CBCL_26	CBCL_27	CBCL_28	CBCL_29	CBCL_30	CBCL_31	CBCL_32	CBCL_33	CBCL_34	CBCL_35	CBCL_36	CBCL_37	CBCL_38	CBCL_39	CBCL_40	CBCL_41
1	2008	9	9	57	1	2003	11	26	0	1	1	1	1	1	0	1	0	1	0	1	1	0	2	2	0	1	0	1	1	2	1	1	0	0	1	0	1	1	0	1	1	1	0	1	1	0	0	1	0
2	2008	9	9	58	2	2003	11	9	0	1	2	0	0	0	0	1	1	1	1	0	2	0	1	1	0	0	0	1	0	2	1	0	1	0	1	0	2	2	0	1	2	0	0	0	0	2	0	1	0
3	2008	9	1	45	1	2004	11	8	0	1	1	0	0	0	0	1	1	0	0	0	1	0	1	1	0	0	0	2	0	2	1	2	0	1	1	0	1	2	0	2	2	0	1	1	2	2	0	0	0
4	2008	9	11	46	1	2004	11	8	1	1	2	1	0	1	0	2	0	1	0	0	1	0	1	1	0	0	0	1	1	1	0	1	1	0	1	0	1	2	0	1	1	2	1	1	2	0	0	0	0
5	2008	8	31	55	1	2004	1	2	0	0	1	0	1	1	0	1	0	0	1	1	1	0	1	1	0	0	0	1	0	2	1	2	1	0	0	0	0	1	0	1	2	1	1	1	1	0	0	0	0
6	2008	8	30	70	2	2002	10	6	0	0	0	0	0	0	0	0	0	0	1	0	1	0	1	0	0	0	0	1	0	1	0	0	0	0	0	0	0	0	0	1	1	0	0	0	0	0	0	0	0
7	2008	9	1	56	2	2003	12	6	0	0	1	1	0	0	0	1	0	1	1	0	1	0	1	1	0	0	0	1	0	2	1	0	0	0	1	0	1	2	0	1	1	0	0	1	1	0	0	0	0
8	2008	9	3	71	1	2002	9	13	0	1	2	2	0	0	0	2	0	1	0	0	0	0	0	1	0	0	1	0	0	2	0	1	1	0	0	0	1	1	0	0	1	0	0	1	0	0	0	0	0
9	2008	9	1	79	1	2002	1	14	0	0	2	2	0	0	0	1	0	1	1	1	1	0	0	0	0	0	0	1	0	2	1	1	0	1	0	2	1	0	0	0	0	0	0	1	2	0	1	0	0
10	2008	9	1	60	2	2003	8	21	0	1	1	0	1	0	0	0	0	1	0	1	1	0	0	1	0	0	0	1	0	2	1	1	0	0	0	0	2	2	0	2	2	1	0	1	1	1	0	0	0
11	2008	9	7	48	1	2004	8	30	0	0	1	0	0	0	1	1	0	1	1	0	1	0	0	1	0	0	0	0	0	2	0	0	0	0	0	0	1	1	0	1	1	0	0	0	1	0	0	0	0
13	2008	9	3	57	2	2003	11	8	0	1	0	0	0	0	0	0	0	1	2	1	1	0	1	0	0	1	0	0	0	2	1	1	1	0	0	0	1	2	0	0	1	2	2	1	1	0	0	1	0
14	2008	9	5	40	1	2005	4	9	0	1	2	0	0	0	0	1	0	1	1	0	0	0	0	1	0	0	1	1	1	2	2	0	0	0	0	0	0	0	0	1	0	0	0	0	2	0	0	0	0
15	2008	9		63	1	2003	5	20	1	2	0	1	1	1	0	0	1	0	1	0	0	0	1	1	0	0	1	1	0	1	2	1	0	0	1	0	0	1	1	0	0	1	0	1	0	1	0	0	0
21	2008	9	10	74	1	2002	6	27	0	1	1	1	0	0	0	1	0	1	1	0	1	0	1	0	0	0	0	1	1	2	1	2	0	0	0	0	0	2	0	2	1	0	0	0	2	1	0	0	0
28	2008	9	19	48	2	2004	9	13	0	1	1	0	1	0	0	1	0	2	1	0	2	0	1	2	0	0	0	1	0	2	1	2	0	0	0	0	1	2	0	0	2	1	1	1	2	1	0	0	0
29	2008	9	23	63	1	2003	6	13	0	1	1	1	0	0	0	1	0	1	1	0	1	0	2	1	1	0	0	2	0	2	1	0	0	0	1	1	2	2	0	1	2	0	1	2	1	1	0	0	0
31	2008	10	1	66	1	2003	3	17	0	0	1	0	0	1	0	2	0	1	1	0	2	0	1	1	0	0	0	0	1	2	1	0	0	0	0	0	1	1	0	1	1	1	1	2	1	0	0	1	0
32	2008	9	21	76	2	2002	5	13	0	1	1	0	0	0	0	1	0	0	0	0	0	0	0	1	0	0	0	1	1	1	0	1	0	0	0	0	0	2	0	1	2	0	0	1	1	0	1	0	0
34	2008	9	20	59	2	2003	10	19	0	1	0	0	1	2	0	1	0	0	1	0	2	0	0	1	0	0	1	2	0	2	0	0	0	0	0	0	0	2	0	2	1	1	1	2	1	0	0	0	0
36	2008	9	20	40	2	2005	5	16	0	0	0	0	0	0	0	0	0	0	0	0	1	0	1	1	0	0	0	1	0	2	1	1	1	0	1	0	2	2	0	0	1	0	0	0	2	2	0	0	0
37	2008	9	24	45	2	2004	12	23	0	1	2	2	1	0	0	1	0	2	2	0	2	0	1	2	0	0	0	2	1	2	2	2	1	0	0	0	1	1	0	2	1	1	0	0	2	2	0	0	0
40	2008	9		52	2	2004	5	4	0	0	2	1	1	0	1	0	0	1	1	1	1	0	1	1	0	0	0	1	1	1	2	2	0	0	0	0	1	1	0	2	1	0	0	0	1	0	0	1	0
41	2008	9		81	1	2001	12	14	0	1	1	1	1	1	0	2	0	1	1	2	2	1	2	1	0	1	0	2	1	2	1	1	0	0	1	0	1	2	0	1	1	2	1	1	1	0	0	1	0
46	2008	9	23	63	1	2003	6	23	0	0	2	0	0	1	0	0	0	1	1	0	1	1	1	1	1	0	0	1	1	2	0	0	0	0	0	0	1	1	0	0	1	0	1	1	1	1	0	1	0
49	2008	9	23	58	2	2003	11	13	0	0	2	1	1	0	0	0	0	1	1	0	2	0	0	0	0	0	0	0	1	1	1	0	0	0	0	0	1	1	0	1	2	0	0	0	2	0	0	1	0
50	2008	9	29	73	1	2002	8	17	0	1	1	1	0	0	0	1	0	0	1	0	1	0	1	0	0	0	0	1	1	1	1	1	1	0	0	0	1	1	0	0	1	1	0	1	1	0	2	0	0
54	2008	9	24	75	1	2002	6	15	0	0	1	0	1	0	0	1	0	1	0	1	0	0	1	1	0	0	1	1	1	2	0	0	0	0	0	0	1	2	0	1	2	0	0	1	0	0	0	0	0
57	2008	10	10	41	1	2005	4	20	0	0	0	0	1	1	0	1	0	1	1	0	1	0	1	1	1	0	0	1	0	2	0	0	0	0	0	0	1	2	0	1	1	1	1	2	1	0	0	0	0
58	2008	9	28	60	1	2003	9	4	0	1	2	1	1	1	0	1	0	1	1	0	0	1	1	1	1	0	0	1	0	0	1	1	1	0	0	0	1	1	0	1	1	1	1	0	1	1	0	0	0
63	2008	9	27	49	1	2004	8	20	0	1	1	0	1	2	0	1	0	1	1	0	1	1	1	1	0	0	0	1	1	2	1	2	0	0	0	0	1	1	0	0	1	0	0	1	1	1	0	0	0
66	2008	9	28	37	2	2005	8	10	0	0	0	1	0	0	0	0	0	0	1	0	0	0	0	0	0	0	0	0	1	2	2	0	0	0	0	0	1	2	0	0	1	0	0	1	1	0	0	0	0
70	2008	10	2	59	1	2003	10	17	0	1	1	0	1	0	0	1	0	1	0	0	1	0	1	1	0	0	0	1	0	1	0	0	0	0	1	0	1	2	0	1	1	0	0	1	1	0	0	1	0
74	2008	9	29	64	1	2003	5	20	0	0	0	0	0	0	0	1	0	1	0	0	1	0	1	1	0	0	0	1	0	1	1	0	0	0	0	0	0	2	0	0	0	0	0	0	1	0	0	0	0
77	2008	10	8	44	1	2005	1	20	0	0	1	0	0	0	0	0	0	1	1	1	1	0	1	1	1	0	1	1	0	0	0	2	0	0	0	0	1	1	0	1	1	1	1	1	1	0	0	1	1
79	2008	10	6	81	1	2001	12	21	0	1	1	1	0	0	0	1	0	0	1	0	1	0	0	0	0	0	0	1	1	0	1	0	1	0	0	1	1	0	0	1	1	0	0	0	0	0	0	0	0
80	2008	10	18	80	2	2002	2	7	0	0	1	0	0	0	0	1	0	0	0	1	2	0	1	1	0	0	0	1	1	0	1	1	0	0	0	0	1	1	0	0	1	0	1	1	0	1	0	0	0
82	2008	10	2	37	2	2005	8	30	0	1	0	0	1	1	0	0	1	1	1	0	0	0	0	1	0	0	0	1	1	2	1	1	1	0	0	0	0	1	1	0	1	1	1	1	2	1	0	0	0
88	2008	10	9	75	2	2002	6	29	0	0	0	0	0	1	0	1	0	0	0	0	0	0	0	0	0	0	0	1	0	1	1	0	0	0	0	0	0	1	0	0	0	0	0	1	1	0	0	0	0
100	2008	10	3	49	1	2004	8	30	0	0	1	0	1	2	2	2	0	0	1	1	0	0	1	2	1	1	0	1	1	0	0	2	0	0	0	0	1	1	2	1	1	0	0	0	0	1	0	1	0
102	2008	10	6	65	1	2003	4	20	0	1	1	0	0	0	0	0	0	0	0	0	1	0	0	0	0	0	0	1	0	2	1	1	0	0	0	0	1	1	0	1	1	0	0	1	1	0	0	0	0
103	2008	10	14	40	2	2005	5	23	0	0	0	0	0	0	0	1	0	0	0	0	0	0	0	0	0	0	0	0	0	1	1	1	0	0	0	0	0	2	0	0	2	0	0	1	1	0	0	0	0
104	2008	10	1	72	2	2002	9	11	0	0	0	0	0	0	0	0	0	1	0	0	1	0	0	1	0	0	0	0	0	2	1	0	0	0	0	0	0	0	0	2	1	0	0	1	0	0	0	0	0
105	2008	10	5	68	1	2003	2	5	1	0	1	0	0	0	2	1	0	1	1	0	1	0	0	0	0	0	0	1	0	1	0	1	0	0	0	0	0	1	0	0	2	1	0	0	1	1	1	0	0
108	2008	10	6	72	2	2002	9	13	2	1	0	0	1	1	0	0	1	0	0	1	0	0	0	0	0	0	1	0	0	2	0	2	0	0	0	0	0	1	1	1	1	1	0	0	1	2	0	0	0
109	2008	10	4	36	1	2005	9	23	0	0	1	1	1	2	0	1	0	0	0	0	0	0	1	1	1	0	0	1	1	1	1	2	0	0	1	0	0	1	1	0	0	2	1	0	1	0	0	1	0
112	2008	10		58	2	2003	12	3	0	1	1	0	0	0	0	1	1	1	1	1	1	0	1	2	0	0	0	1	0	2	1	1	1	0	0	1	2	1	0	1	1	0	1	1	1	0	0	1	0
115	2008	10	9	43	1	2005	2	14	0	1	0	1	1	1	1	1	0	0	0	0	1	0	0	1	0	0	0	1	0	0	1	0	0	0	0	0	0	0	0	0	0	1	1	1	1	0	0	0	0
116	2008	10		46	1	2004	11	16	0	1	1	0	1	2	0	1	0	1	1	0	1	0	1	1	0	0	1	1	0	2	1	1	0	0	1	0	1	0	0	1	1	1	0	1	0	0	0	0	0
117	2008	10	8	47	2	2004	11	4	0	1	1	1	1	1	0	0	1	1	1	1	1	0	1	1	1	0	0	1	1	2	2	1	1	0	1	0	1	1	0	0	1	0	0	1	2	1	0	0	0
127	2008	10	10	57	2	2004	1	3	0	0	1	0	1	0	0	0	0	0	1	0	0	0	1	0	0	0	0	0	0	1	0	0	0	0	1	0	0	2	0	1	1	0	1	0	1	0	0	1	0
130	2008	10	12	76	1	2002	5	27	0	0	0	0	1	0	1	0	0	0	1	0	0	0	0	0	0	0	0	0	0	1	0	0	0	0	0	0	0	0	0	1	1	0	1	1	0	0	0	0	0
142	2008	10	21	56	2	2004	2	9	0	0	1	0	0	0	1	0	0	0	0	0	0	0	0	1	0	0	0	0	0	2	1	0	0	0	0	0	0	1	0	0	1	0	0	0	0	0	0	0	0
144	2008	10	14	43	2	2005	2	23	0	0	1	0	1	0	0	0	0	0	0	0	1	0	1	1	0	0	0	1	0	2	1	1	0	0	0	0	1	1	0	0	1	0	0	0	0	0	0	0	0
146	2008	10	20	38	1	2005	7	25	0	0	0	0	1	1	0	1	1	1	1	0	1	0	0	0	1	0	0	1	0	2	0	1	0	0	0	0	0	2	0	0	0	1	0	1	1	0	0	0	0
153	2008	10	18	65	1	2003	5	18	0	0	1	0	1	1	0	0	0	1	1	2	0	0	1	1	0	0	0	1	1	2	0	1	0	1	1	0	1	1	0	1	1	0	0	1	2	1	0	0	0
154	2008	10	20	54	1	2004	3	29	0	0	1	1	0	0	0	1	0	0	1	0	1	0	0	1	0	0	0	1	0	2	2	1	0	0	0	0	1	1	0	0	1	1	0	0	0	0	0	0	0
156	2008	10	24	40	2	2005	6	23	1	1	1	1	0	0	0	1	0	1	1	0	1	0	1	1	1	1	0	1	1	2	1	1	1	0	1	1	1	1	0	1	1	1	1	1	1	1	1	1	0
165	2008	10	18	52	1	2004	5	24	0	0	0	0	0	0	0	0	0	0	0	0	0	0	0	0	0	0	0	0	0	2	1	0	0	0	0	0	1	1	0	0	0	0	0	0	1	0	0	0	0
171	2008	10	20	71	2	2002	10	22	0	0	1	0	0	0	0	0	0	1	0	0	0	0	0	0	0	0	0	0	0	2	0	1	0	0	0	0	1	1	0	0	1	0	0	0	2	1	0	0	0
187	2008	10	30	46	2	2004	12	9	0	0	0	0	1	1	0	1	0	1	1	0	1	0	0	1	0	0	0	1	0	2	1	0	1	0	0	0	1	1	0	2	1	1	1	0	1	0	0	0	0
197	2008	10	27	64	2	2003	6	5	0	0	0	0	0	0	0	0	0	0	0	0	0	0	1	0	0	0	0	1	0	1	1	1	0	0	0	0	0	1	0	0	0	0	0	0	0	0	0	0	0
192	2008	10	25	49	1	2004	9	22	0	1	0	1	1	1	0	1	0	1	1	0	1	0	1	1	1	1	0	1	1	2	1	1	2	1	1	2	1	1	0	1	1	1	1	1	0	2	0	1	0
219	2008	11	3	46	1	2004	12	31	0	1	2	2	1	0	0	0	0	2	1	1	1	0	1	1	1	1	0	1	0	2	1	0	0	0	0	0	1	1	0	0	2	1	0	1	2	1	0	0	0
215	2008	11	1	76	1	2002	6	30	0	1	1	2	2	2	1	2	0	1	1	0	1	0	1	2	0	1	0	2	2	2	2	2	1	0	1	1	2	1	0	2	2	2	1	1	2	1	1	2	0
224	2008	11	4	55	1	2004	3	5	2	0	1	0	0	2	0	1	0	1	1	0	2	0	1	1	1	1	1	1	0	1	1	2	1	0	1	0	0	2	0	1	2	1	0	1	1	0	0	1	0
212	2008	11	1	45	2	2005	1	3	0	0	0	0	0	0	0	0	0	0	0	0	0	0	0	0	0	0	0	1	1	1	0	1	0	0	0	0	0	1	0	1	1	0	0	1	0	0	0	0	0
191	2008	10	25	59	1	2003	11	4	0	1	1	0	1	1	0	1	0	0	0	0	2	0	0	1	0	0	0	1	1	2	1	1	0	0	0	0	1	0	0	0	2	0	0	0	0	1	0	0	0
180	2008	10	28	75	2	2002	7	8	1	1	0	0	0	0	0	0	0	0	0	0	0	0	0	0	0	0	0	0	0	2	1	0	0	1	0	0	0	1	0	0	1	0	0	1	0	0	0	0	0
175	2008	10	19	62	1	2003	8	4	0	0	1	1	0	0	0	1	0	0	1	0	1	0	1	1	0	0	1	1	0	2	0	1	0	1	0	0	1	1	0	1	1	1	0	0	1	0	1	0	0
176	2008	10	20	75	1	2002	6	24	0	1	0	0	1	0	0	1	1	0	0	0	0	0	1	1	1	0	0	1	0	0	1	0	0	0	0	0	0	1	1	1	1	1	0	1	1	0	1	1	0
26	2008	9	20	41	1	2005	4	4	0	0	1	2	1	2	1	2	0	0	1	0	2	0	0	2	0	0	0	1	2	2	2	2	0	1	0	1	2	0	0	1	1	2	0	0	1	0	0	0	0
152	2008	10	22	63	1	2003	7	16	0	0	0	0	0	1	0	0	0	0	0	0	0	0	0	0	0	0	0	0	0	1	0	0	0	0	0	0	0	0	0	0	0	0	0	0	0	0	0	0	0
199	2008	10	28	43	1	2005	3	18	0	0	1	0	1	1	1	0	0	1	1	0	1	0	0	0	1	0	0	1	0	2	0	0	1	0	0	0	1	1	0	1	2	0	1	1	1	1	0	1	0
101	2008	10	20	38	1	2005	8	18	0	1	1	0	0	0	1	1	0	0	0	0	0	0	0	1	0	0	0	0	0	2	0	1	0	0	0	0	0	1	0	2	1	0	0	0	1	0	0	0	0
172	2008	10	28	71	1	2002	11	11	0	1	1	0	0	0	0	1	0	1	1	0	1	0	0	1	0	0	2	1	0	2	1	2	0	0	0	0	1	1	0	1	1	1	0	1	1	0	0	0	0
181	2008	10	24	78	2	2002	4	6	1	0	1	0	0	0	0	1	0	0	1	1	1	0	0	1	0	0	0	1	0	1	1	1	0	0	0	0	0	1	0	0	1	0	0	0	0	0	0	0	0
133	2008	7	1	36	1	2005	6	11	0	0	1	1	0	1	0	0	0	0	0	0	0	0	0	0	0	0	0	2	0	0	1	0	0	0	0	0	0	0	0	0	0	1	0	2	0	0	0	0	0
196	2008	10	27	39	1	2005	7	26	0	1	0	0	0	0	0	1	1	0	0	0	1	0	0	1	0	0	0	1	1	1	0	1	0	0	0	0	0	1	0	0	1	0	0	0	1	0	0	1	0
68	2008	10		50	2	2004	7	14	0	0	1	0	1	1	0	0	0	0	0	1	2	0	1	2	1	0	1	1	0	2	0	1	0	0	0	0	1	2	0	1	1	1	0	1	0	0	0	0	0
190	2008	11	7	58	2	2003	12	17	0	1	0	0	0	1	0	1	0	0	0	0	1	0	2	1	0	1	0	2	0	2	0	2	1	0	1	0	2	2	0	1	2	0	1	1	1	1	0	0	0
123	2008	10	9	54	1	2004	3	16	0	0	1	0	0	0	0	1	0	1	1	0	0	0	1	1	0	0	0	1	0	2	1	2	1	0	1	1	2	1	0	2	2	0	0	0	1	0	0	0	0
216	2008	11	10	63	2	2003	8	10	1	0	0	0	0	0	0	1	0	0	1	0	2	0	0	1	0	0	1	1	0	1	1	2	0	1	0	0	1	1	0	0	1	2	0	0	1	0	0	0	0
223	2008	11	5	71	2	2002	11	24	0	0	0	0	0	0	0	0	0	0	0	0	0	0	0	0	0	0	0	1	0	2	0	2	0	0	0	0	0	0	0	0	0	0	0	0	1	0	0	0	0
147	2008	10	27	62	1	2003	8	11	0	2	2	2	0	1	0	2	0	2	2	1	1	2	2	2	0	1	0	2	0	2	2	2	1	2	2	0	2	2	0	2	2	0	1	2	1	1	0	1	0
204	2008	10	30	73	1	2002	9	11	1	0	1	0	2	1	1	0	0	0	0	0	0	0	0	0	0	0	1	1	1	0	1	0	1	0	1	0	1	0	0	0	0	0	0	0	0	0	1	0	0
221	2008	11	5	64	1	2003	6	27	0	1	1	0	2	2	0	0	1	0	1	0	0	0	0	1	0	0	0	0	0	2	1	2	0	0	0	0	0	1	0	0	2	1	1	2	1	0	0	0	0
168	2008	10	20	48	1	2004	10	19	0	1	1	0	0	0	2	1	1	1	1	2	1	0	0	1	0	0	0	1	1	2	1	0	0	0	1	0	0	2	1	1	1	0	0	0	2	1	0	0	0
183	2008	11	5	36	1	2005	10	22	0	0	1	0	0	0	1	0	0	1	1	0	0	0	0	0	0	0	0	0	0	2	0	0	0	0	0	0	0	1	0	0	0	0	0	0	1	0	0	0	0
220	2008	11	3	43	2	2005	3	21	0	0	1	0	0	0	1	1	0	0	0	0	1	0	0	0	0	0	0	1	0	2	1	0	0	0	0	0	1	1	0	1	0	0	0	0	1	0	0	0	0
226	2008	11	7	40	2	2005	3	3	1	0	1	0	1	0	0	0	0	0	0	0	0	0	0	0	0	0	0	0	1	2	1	2	0	0	0	0	2	1	0	0	1	1	1	1	2	1	0	0	0
218	2008	11	1	80	1	2002	2	25	0	0	0	0	0	0	0	0	0	0	0	0	0	0	0	0	0	0	0	0	0	0	0	0	0	0	0	0	0	0	0	0	0	0	0	0	0	0	0	0	0
96	2008	10	24	59	1	2003	11	8	1	1	0	2	1	2	0	1	2	0	1	1	1	0	1	1	0	0	1	1	0	1	1	0	1	0	0	0	2	2	1	2	1	2	1	2	0	2	1	2	0
236	2008	11	20	46	2	2004	12	29	0	1	0	1	1	1	2	2	1	1	1	1	1	0	1	2	1	1	1	1	1	1	1	1	1	1	1	0	2	1	2	2	2	1	0	2	1	2	0	1	0
240	2008	11	20	79	1	2002	3	24	0	0	1	1	2	2	0	0	0	1	1	0	0	0	0	0	0	0	0	0	1	2	1	0	1	0	0	1	1	1	0	0	1	0	0	0	1	0	0	0	0
232	2008	11	8	82	1	2002	1	1	0	0	0	0	0	0	0	2	0	0	1	0	2	1	2	2	1	2	0	2	1	2	1	0	0	0	0	0	2	0	0	2	2	1	1	1	1	0	0	0	0
244	2008	11	14	77	2	2002	5	28	0	0	0	0	0	2	0	0	1	0	0	0	1	0	0	1	0	0	0	0	0	1	1	1	0	0	0	0	0	1	0	0	1	0	0	0	0	1	0	0	0
239	2008	11	20	60	2	2003	11	3	0	1	1	0	0	0	1	1	1	0	0	0	1	0	1	1	0	0	0	1	0	2	1	1	0	0	1	1	1	2	0	1	1	0	0	1	1	1	0	1	0
231	2008	11	21	75	1	2002	7	29	1	0	0	0	0	1	1	1	0	0	0	0	0	0	0	1	1	0	0	1	1	0	1	0	0	0	0	0	1	1	0	0	1	1	0	1	0	0	1	1	0
249	2008	11	21	50	1	2004	9	10	1	1	0	0	2	2	0	2	1	0	1	0	2	1	2	1	1	1	0	2	1	0	0	1	1	0	0	0	2	2	1	1	2	2	1	2	0	0	1	2	0
198	2008	11	20	73	1	2002	10	19	0	0	1	1	0	1	0	2	0	0	0	0	1	0	1	2	0	0	0	1	1	0	0	0	0	0	1	0	2	1	0	0	1	1	1	1	0	0	0	0	0
43	2008	12	12	39	1	2005	9	5	0	2	2	0	0	0	0	1	2	1	2	0	1	0	1	1	1	1	0	1	1	1	1	2	2	2	1	1	1	0	1	2	1	1	0	0	1	1	0	1	0
176	2008	10	20	47	1	2004	11	10	0	1	1	0	0	1	0	1	0	1	1	0	1	0	0	1	0	0	0	1	1	1	0	0	1	1	0	0	1	1	0	1	1	0	1	1	1	0	0	0	0
206	2008	12	9	51	2	2004	8	22	0	1	1	0	1	1	1	1	1	1	1	0	1	0	1	1	0	0	0	1	1	2	1	1	1	0	0	0	1	1	1	1	1	0	1	2	2	1	0	1	0
241	2008	11	28	49	1	2004	10	15	0	0	1	0	1	0	0	1	0	1	1	0	0	0	1	1	1	1	0	1	0	2	1	1	1	0	1	0	2	1	0	1	1	1	1	1	0	0	0	1	0
251	2008	11	15	39	2	2005	7	16	0	0	0	1	0	0	0	0	0	0	1	0	1	0	1	1	0	0	0	1	0	2	2	0	1	0	1	0	1	0	0	1	1	1	0	0	2	0	0	0	0
253	2008	11	16	72	2	2002	10	25	0	0	0	0	0	0	1	0	0	0	0	0	2	0	0	0	0	0	0	0	0	1	1	1	0	0	0	0	0	2	0	0	2	0	0	0	0	0	0	0	0
257	2008	12	1	43	2	2005	4	3	0	0	1	1	0	0	0	1	0	1	1	0	1	0	0	1	0	0	0	1	0	2	2	1	0	0	0	0	1	1	0	1	2	0	0	0	1	0	0	0	0
260	2008	12	3	62	1	2003	9	6	0	0	2	0	0	2	0	1	0	2	2	0	1	0	0	1	0	0	1	1	1	2	2	1	1	0	1	1	1	0	0	1	1	0	0	1	2	2	0	0	1
261	2008	12	9	51	1	2004	8	18	0	2	1	1	1	0	0	1	1	1	1	0	2	0	1	2	0	0	0	2	0	2	1	1	0	0	1	0	2	2	0	2	2	1	1	0	2	0	0	0	0
262	2008	12	10	64	2	2003	7	18	0	0	0	0	0	0	0	0	0	0	0	0	0	0	0	0	0	0	0	0	0	0	0	0	0	0	0	0	0	0	0	0	0	0	0	0	0	0	0	0	0
263	2008	12	15	37	2	2005	10	30	0	0	1	0	1	0	0	1	0	0	1	0	0	0	1	1	0	0	0	1	0	1	2	1	0	0	0	0	2	1	0	1	1	0	1	1	2	0	0	0	0
272	2008	12	19	56	1	2004	4	12	0	0	0	0	0	0	0	0	0	0	0	0	0	0	0	0	0	0	0	0	0	2	1	0	0	0	0	0	0	1	0	0	1	0	0	0	0	0	0	0	0
273	2008	12	23	50	1	2004	9	26	0	0	1	0	0	0	1	0	1	0	0	0	1	0	0	0	0	0	0	0	0	1	0	1	1	0	0	1	1	1	0	1	1	0	0	0	1	1	0	0	0
255	2009	1	5	41	1	2005	7	28	0	1	1	1	0	0	2	1	0	2	2	0	2	0	1	1	0	0	0	1	1	2	1	1	1	0	0	1	1	1	0	2	2	2	0	0	1	2	0	0	0
266	2008	12	31	57	2	2004	3	5	0	0	1	1	0	0	0	1	1	0	1	1	2	0	1	1	0	0	0	1	0	1	0	0	1	0	0	0	1	1	0	1	1	1	0	0	0	0	0	0	0
269	2008	12	14	59	1	2003	12	27	0	1	0	0	1	0	0	1	0	0	0	0	1	0	1	1	0	0	0	1	0	1	0	2	0	0	0	0	1	1	0	1	1	0	0	1	1	0	0	0	0
277	2009	1	14	46	2	2005	2	21	0	0	1	0	1	1	0	2	0	1	1	0	2	0	1	2	1	1	0	1	1	2	1	2	0	0	1	0	2	1	0	0	2	1	1	1	1	2	0	1	0
282	2009	1	9	73	2	2002	11	15	0	1	1	0	0	0	0	0	0	1	1	0	0	0	0	1	0	0	0	0	0	0	0	0	0	1	1	0	0	2	0	0	0	0	1	2	0	0	0	0	0
294	2009	1	30	50	2	2004	11	25	0	1	0	0	1	2	1	2	2	2	1	0	1	0	1	1	0	0	0	1	0	2	1	0	1	0	0	0	2	2	0	2	1	1	1	1	1	0	0	1	1
288	2009	1	15	37	1	2005	11	25	0	0	0	0	0	0	1	1	1	0	0	0	1	0	0	1	0	0	0	1	0	1	1	1	1	0	1	0	1	2	0	1	1	1	1	0	1	1	0	0	0
287	2009	1	15	65	2	2003	8	13	0	0	0	1	0	1	1	1	0	0	0	1	1	0	0	1	0	0	0	1	0	0	1	0	1	1	0	0	1	1	0	2	1	2	0	1	0	1	1	0	0
303	2009	2	11	51	1	2004	10	22	0	1	1	1	1	0	1	0	0	1	1	0	1	0	0	0	0	0	0	0	1	2	1	1	0	1	0	1	1	1	0	2	1	0	0	1	2	0	0	0	0
307	2009	2	20	56	1	2004	6	6	0	0	0	0	0	0	0	1	0	0	1	0	0	0	0	0	0	0	0	0	0	0	0	1	1	0	0	0	0	1	0	0	0	0	0	0	0	0	0	0	0
311	2009	2	25	82	2	2002	4	12	0	1	1	0	1	0	0	2	0	2	1	0	2	0	1	1	0	0	0	1	0	2	0	1	1	0	1	0	1	1	0	0	1	0	1	1	1	1	1	0	0
317	2009	3	4	39	2	2005	11	21	0	0	1	1	0	0	0	0	0	1	1	1	2	0	1	1	0	0	1	1	0	2	1	1	1	0	1	0	1	1	0	0	1	0	0	2	1	0	0	0	0
316	2009	3	1	58	1	2004	4	17	0	1	0	0	0	2	0	2	0	0	0	2	2	0	2	2	2	2	1	2	0	1	0	1	1	0	2	0	2	1	0	0	2	0	1	2	0	0	0	2	0
306	2009	3	4	41	2	2005	10	1	0	0	1	0	0	0	0	0	0	0	0	0	1	0	0	0	0	0	0	0	0	2	1	2	0	0	0	2	0	0	0	1	1	0	0	1	1	1	0	0	0
300	2009	2	16	45	2	2005	5	3	0	0	0	0	0	0	0	1	0	0	0	0	1	0	1	1	0	0	0	1	0	1	1	0	0	0	0	0	0	1	1	0	0	1	1	1	0	2	0	0	0
309	2009	3	18	56	1	2004	7	15	0	0	0	0	1	1	0	1	1	0	0	1	1	0	1	1	0	0	0	1	0	0	0	1	0	0	1	0	1	0	0	0	1	1	1	1	0	0	0	0	0
298	2009	3	16	74	2	2003	1	12	0	0	2	0	0	0	0	1	1	1	1	1	0	0	0	1	0	0	0	1	1	2	0	2	2	2	1	1	2	2	0	2	2	0	1	2	2	2	0	0	0
301	2009	2	15	41	1	2005	8	29	0	2	1	0	2	1	0	1	1	0	1	0	1	0	1	1	0	0	0	1	0	1	1	1	0	0	1	0	1	1	0	0	1	1	1	1	0	0	0	1	0
314	2009	3	11	64	2	2003	11	7	0	0	1	2	1	1	0	0	0	0	1	1	1	0	0	0	0	0	0	0	1	1	1	0	1	0	0	0	0	1	0	0	2	1	0	0	1	1	0	0	2
324	2009	3	14	65	2	2003	10	13	0	1	1	0	1	0	0	0	0	1	1	0	0	0	0	0	0	0	0	1	0	2	1	0	1	0	0	0	2	2	0	0	1	0	0	0	0	1	0	0	0
326	2009	3	29	43	2	2005	8	16	0	0	1	0	0	0	0	0	0	0	1	0	1	0	0	0	0	0	0	0	0	0	0	0	0	0	0	0	1	1	0	0	1	0	0	0	0	0	0	0	0
330	2009	3	31	65	2	2003	10	8	0	0	0	0	0	0	0	0	0	0	0	0	0	0	0	0	0	0	0	0	0	1	0	0	0	0	0	0	0	0	0	0	0	0	0	0	0	0	0	0	0
332	2009	4	4	57	2	2004	6	15	1	1	0	0	0	1	0	0	1	0	0	0	2	0	0	0	0	0	0	1	0	1	0	1	0	0	0	0	1	1	0	0	1	0	0	1	0	0	0	0	0
322	2009	3	10	80	2	2002	6	11	0	0	1	1	0	0	0	0	0	1	0	0	2	0	2	1	0	0	0	1	0	1	2	1	0	0	0	1	2	2	0	2	2	0	0	0	1	1	0	0	0
328	2009	3	31	42	2	2005	9	8	0	1	1	0	1	0	0	0	0	1	1	1	1	0	0	0	0	0	0	1	0	2	1	0	0	0	0	0	0	2	0	1	1	1	1	1	1	1	0	0	0
333	2009	4	15	40	1	2005	11	19	2	2	2	1	1	0	0	1	0	2	2	0	1	1	1	1	1	1	0	1	1	2	2	1	1	0	1	1	2	1	0	1	2	1	0	1	2	2	1	0	0
338	2009	4	5	70	2	2003	5	30	0	0	1	0	0	0	0	0	0	0	1	0	1	0	0	1	0	0	0	0	0	2	0	0	0	0	0	1	1	1	0	2	1	0	0	1	1	0	0	0	0
341	2009	4	14	41	1	2005	10	17	0	0	2	1	0	2	0	1	1	2	1	0	2	0	2	1	1	1	0	1	1	2	2	0	1	1	1	0	0	1	1	2	1	2	1	0	2	1	0	1	0
342	2009	4	14	41	1	2005	10	17	0	0	0	0	0	0	0	0	0	0	0	0	0	0	0	0	0	0	0	0	0	0	0	0	0	0	0	0	0	1	0	0	0	0	1	1	0	0	0	0	0
346	2009	4	21	51	1	2005	1	15	0	1	2	1	2	0	0	0	0	1	2	2	0	0	0	0	0	0	0	1	1	0	1	1	1	1	0	1	1	0	0	1	1	0	0	0	2	0	0	0	0
361	2009	5	10	63	1	2004	1	14	0	1	1	0	0	0	1	2	0	2	1	0	0	0	0	1	0	0	0	0	1	2	0	1	1	0	0	1	1	1	0	1	1	1	0	1	2	0	0	0	0
365	2009	5	18	70	2	2003	7	2	0	0	0	0	0	0	0	0	0	0	0	0	0	0	0	0	0	0	0	0	0	1	0	0	0	0	0	0	0	1	0	0	1	0	0	0	1	0	0	0	0
368	2009	6	4	76	1	2003	1	17	0	0	0	0	0	0	0	0	0	0	0	0	0	0	0	0	0	0	0	1	0	0	0	0	0	1	0	1	0	1	0	0	0	0	0	1	0	0	0	0	0
378	2009	6	18	46	2	2005	8	8	0	0	1	0	2	1	0	0	0	2	2	0	1	0	1	1	0	0	2	1	1	2	2	2	2	0	1	1	2	2	0	1	1	1	1	2	1	1	0	1	0
379	2009	7	6	72	1	2003	7	4	0	0	1	0	0	0	0	0	0	0	0	0	1	0	0	0	0	0	0	0	0	1	0	0	0	0	0	0	0	0	0	2	2	0	0	0	1	0	0	0	0
345	2009	4	20	53	1	2004	11	20	0	0	0	0	1	0	0	0	0	0	1	0	0	0	1	0	0	0	0	1	0	2	0	2	0	0	0	0	0	2	1	1	1	0	1	0	1	0	0	0	0
380	2009	7	8	43	2	2005	11	16	0	2	1	1	0	0	0	1	0	1	1	1	2	0	1	1	0	0	0	2	0	1	1	1	2	0	0	0	2	2	0	0	1	1	0	0	1	1	0	1	0
385	2009	7	14	60	1	2004	6	30	0	1	0	0	0	2	0	1	0	0	1	1	1	0	1	2	0	0	0	2	0	2	2	1	0	0	1	0	1	1	0	0	1	1	0	2	0	0	0	0	0
374	2009	8	14	65	2	2004	2	29	0	0	1	0	0	0	1	1	0	1	0	1	2	0	0	1	0	0	0	0	0	1	1	1	0	0	0	0	0	1	0	1	1	1	0	1	0	1	1	0	0
376	2009	8	15	52	1	2005	4	4	0	0	0	0	1	2	1	1	0	0	0	0	1	0	2	2	2	0	0	2	0	1	0	1	0	0	1	0	2	2	0	0	2	1	2	1	0	1	0	1	0
387	2009	7	25	38	1	2006	5	9	0	2	2	1	0	0	0	1	0	2	2	2	2	0	2	2	1	1	0	2	1	2	2	2	2	2	1	1	2	1	0	1	1	2	0	0	2	2	0	0	0
394	2009	8	7	65	2	2004	2	26	1	1	1	0	2	1	1	1	0	1	1	0	1	0	2	2	1	0	1	2	0	1	0	1	1	0	0	1	2	2	0	2	2	1	1	0	2	1	0	1	0
395	2009	8	16	69	2	2003	11	11	2	2	0	0	1	0	0	0	1	0	0	0	1	0	0	0	0	0	0	0	0	2	0	2	1	0	0	0	2	1	0	2	1	1	1	1	0	0	1	0	0
403	2009	8	27	58	1	2004	10	12	0	0	1	0	0	0	0	1	0	1	1	0	0	0	0	1	0	0	0	0	0	2	1	1	1	1	0	1	1	1	0	0	1	0	1	0	0	0	0	0	0
405	2009	8	30	54	1	2005	2	1	1	1	0	0	0	0	2	1	0	0	0	0	1	0	1	1	0	0	0	1	0	1	1	1	0	0	0	1	1	1	0	0	1	0	0	0	0	0	0	1	0
406	2009	8	29	52	1	2005	4	9	0	0	0	0	0	1	0	2	1	0	1	0	2	0	1	2	1	1	0	1	0	2	0	0	0	0	0	0	1	1	1	0	1	2	1	2	0	1	0	1	0
407	2009	9	1	36	1	2006	8	14	0	0	1	0	2	1	0	1	0	1	1	1	1	2	2	2	1	1	0	2	0	2	1	2	0	0	0	0	2	2	0	2	2	1	1	2	1	1	0	1	0
304	2009	9	10	48	2	2005	9	4	0	0	1	0	1	0	0	2	0	0	1	0	0	0	0	2	0	0	0	1	0	2	0	0	0	0	0	0	1	0	0	1	1	0	0	2	0	0	1	0	0
386	2009	9	20	70	1	2003	11	6	0	1	1	0	0	0	0	0	0	1	0	0	1	0	0	0	0	0	0	0	0	2	0	0	0	0	0	0	0	1	0	0	0	0	0	0	2	0	0	0	0
413	2009	9	17	56	1	2005	1	14	0	0	1	0	0	0	0	1	0	0	1	2	0	0	0	1	0	0	0	1	0	2	1	2	1	0	1	0	1	1	0	0	1	0	0	0	1	0	1	0	0
411	2009	9	9	57	1	2004	12	6	1	1	2	1	1	0	0	1	0	1	1	0	1	0	1	1	0	0	0	1	1	2	1	1	1	0	2	0	1	1	0	1	1	1	0	0	1	1	0	1	0
417	2009	9	14	37	2	2006	8	12	0	0	0	0	0	0	1	1	0	0	1	0	0	0	0	1	0	0	0	0	0	0	1	0	0	0	0	0	0	1	0	0	0	0	0	1	0	0	0	0	0
421	2009	9	17	58	2	2004	11	7	0	0	1	0	1	1	0	1	0	1	1	0	0	0	1	1	1	0	0	2	0	2	1	1	0	0	0	1	1	2	0	0	1	0	0	2	1	0	0	0	0
415	2009	10	17	52	2	2005	6	10	0	2	1	2	0	0	0	1	0	1	0	0	2	0	1	1	0	0	0	1	0	2	2	0	0	0	0	0	2	2	0	2	2	0	0	0	0	2	0	1	0
419	2009	10	23	45	2	2005	12	25	0	0	1	0	0	0	0	1	0	1	1	1	1	0	0	1	0	0	0	0	1	1	1	0	0	0	0	0	1	1	0	1	1	0	1	0	1	1	0	1	0
425	2009	9	22	53	1	2004	3	23	0	0	1	0	0	1	0	1	0	0	1	0	0	0	0	2	0	0	1	1	0	2	0	0	0	0	0	1	2	1	0	0	1	1	0	1	1	0	0	0	0
427	2009	9	29	36	2	2006	9	21	0	0	0	0	0	0	0	1	0	1	1	1	1	0	0	1	0	0	1	1	0	2	2	1	0	1	0	0	1	2	0	1	1	1	0	1	1	0	0	0	0
429	2009	10	10	47	2	2005	10	19	0	0	1	0	0	0	0	1	0	0	1	0	0	0	1	1	0	0	0	1	0	1	0	0	0	0	1	0	1	0	0	1	1	0	0	1	0	0	0	1	0
430	2009	10	7	74	1	2003	10	3	0	0	1	0	0	1	0	1	0	0	1	0	0	0	1	1	0	0	1	1	0	1	1	1	0	0	1	0	0	1	0	1	1	0	1	0	0	1	0	0	0
434	2009	10	24	61	1	2004	9	8	1	1	0	0	1	2	0	1	0	1	1	0	1	0	1	2	0	1	0	2	1	2	1	1	1	0	1	0	1	2	0	1	1	1	2	2	1	1	1	2	0
437	2009	10	19	45	1	2006	1	14	0	0	0	0	0	0	1	0	0	0	0	1	0	0	0	0	0	0	0	0	0	2	0	1	0	0	0	0	0	1	0	0	1	1	0	0	0	0	0	0	0
444	2009	11	2	51	2	2005	7	29	0	1	1	1	1	1	0	2	0	1	1	0	1	0	0	2	0	0	0	1	0	2	1	0	0	0	0	0	0	2	0	1	1	0	0	0	1	1	0	0	0
445	2009	11	2	74	1	2003	8	6	0	0	1	0	0	0	0	0	0	0	1	0	0	0	0	1	0	0	0	0	0	1	0	0	1	0	0	0	0	0	0	0	1	0	0	0	0	0	0	0	0
449	2009	11	30	58	1	2005	1	20	0	0	0	0	0	1	0	1	0	0	0	0	0	0	0	1	1	1	0	1	0	0	1	0	0	0	1	0	1	2	0	1	2	0	0	0	1	0	0	0	0
450	2009	11	30	38	2	2006	9	17	0	1	0	0	0	2	0	0	1	0	1	0	2	0	2	1	2	1	0	2	0	2	0	0	0	0	0	0	2	0	2	0	0	0	0	0	0	0	0	0	0
451	2010	1	1	62	2	2004	10	25	0	0	1	0	1	2	0	1	1	1	1	0	1	0	1	2	0	0	1	1	0	2	0	1	0	0	0	0	1	2	0	1	2	1	1	2	1	0	0	1	0
453	2010	1	6	63	2	2004	9	13	0	0	1	0	0	0	0	0	0	0	0	1	1	0	1	1	0	0	1	1	1	1	1	1	1	0	0	0	1	1	0	1	2	1	0	1	1	1	1	1	0
454	2010	1	8	74	2	2003	10	29	1	1	2	1	1	1	0	1	0	2	1	0	1	0	1	1	0	0	1	1	0	2	1	0	1	0	0	0	1	1	0	2	2	0	0	1	1	0	0	0	0
455	2010	1	17	55	2	2005	5	29	0	0	0	0	0	0	0	1	0	0	1	0	1	0	0	0	0	0	0	1	0	0	1	0	0	0	0	0	0	1	0	1	1	0	0	1	1	0	0	1	0
457	2010	3	1	78	1	2003	8	18	1	0	1	1	0	0	1	0	0	1	0	0	0	0	0	0	0	0	1	1	2	1	0	0	0	0	0	0	1	1	0	2	1	0	0	1	1	1	1	0	0
458	2010	3	15	57	2	2005	5	21	0	1	1	1	1	1	0	1	1	0	1	0	2	0	1	1	0	0	0	1	1	2	1	2	2	1	1	0	1	0	1	1	1	1	1	0	2	1	0	0	0
459	2010	3	22	59	1	2005	3	30	0	1	0	2	0	0	0	0	1	1	1	0	1	0	0	0	0	0	0	0	0	2	1	1	0	0	0	0	1	1	0	0	0	0	0	0	1	3	0	0	0
460	2010	3		44	1	2006	7	9	0	0	0	0	0	0	1	1	1	1	0	0	1	0	0	0	0	0	1	1	0	2	1	1	0	0	1	0	0	2	0	2	1	0	0	1	0	0	0	0	0
462	2010	3	25	48	2	2006	3	15	0	0	2	0	0	0	1	1	0	1	1	0	1	0	0	2	0	0	0	1	1	2	1	2	0	0	0	0	1	2	0	2	1	0	0	0	2	0	0	0	0
467	2010	8		51	2	2006	4	25	0	0	1	0	0	1	0	1	1	0	0	0	1	0	0	1	0	0	0	1	0	2	1	0	0	0	0	0	0	1	0	1	1	0	0	0	0	2	0	0	0
456	2010	2	3	77	1	2003	8	23	0	0	1	1	1	1	1	1	0	0	1	0	1	0	1	0	0	0	0	1	0	0	1	0	0	0	0	0	1	1	0	1	1	1	1	1	0	0	0	0	0
[truncated: 197 more columns]
